# Supplementary material for: Facile synthesis of high-surface-area activated carbon from coal for supercapacitors and high CO2 sorption
Source: Royal Society of Chemistry journal article supplement (doi:10.1039/c5ra26044b), 2016-01-01
Supplement: c5ra26044b1.pdf [file c5ra26044b1.pdf]

## Supplementary Information

### Facile Synthesis of High-surface-area Activated Carbon from Coal for Supercapacitor and High CO<sub>2</sub> Sorption

Zhu Peng, Zhanglong Guo, Wei Chu\*, Min Wei

Department of Chemical Engineering, Sichuan University, Chengdu 610065 (China). E-mail: chuwei1965@scu.edu.cn

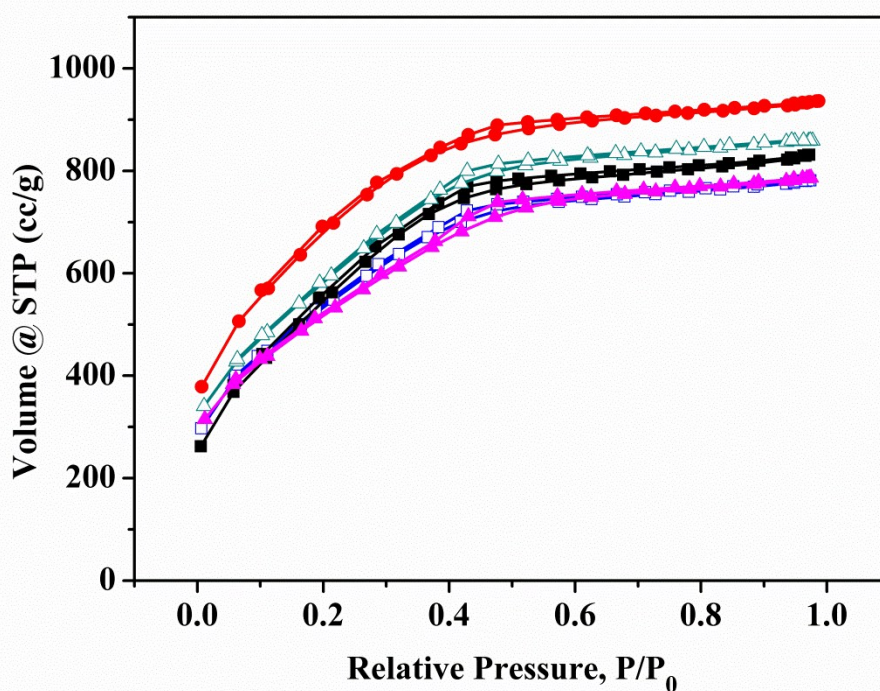

Fig. S1 N<sub>2</sub> adsorption isotherms at 77 K with different activation time

□ AC4T800t1, ■ AC4T800t1.5, ● AC4T800t2, ▲ AC4T800t2.5, ▲ AC4T800t3

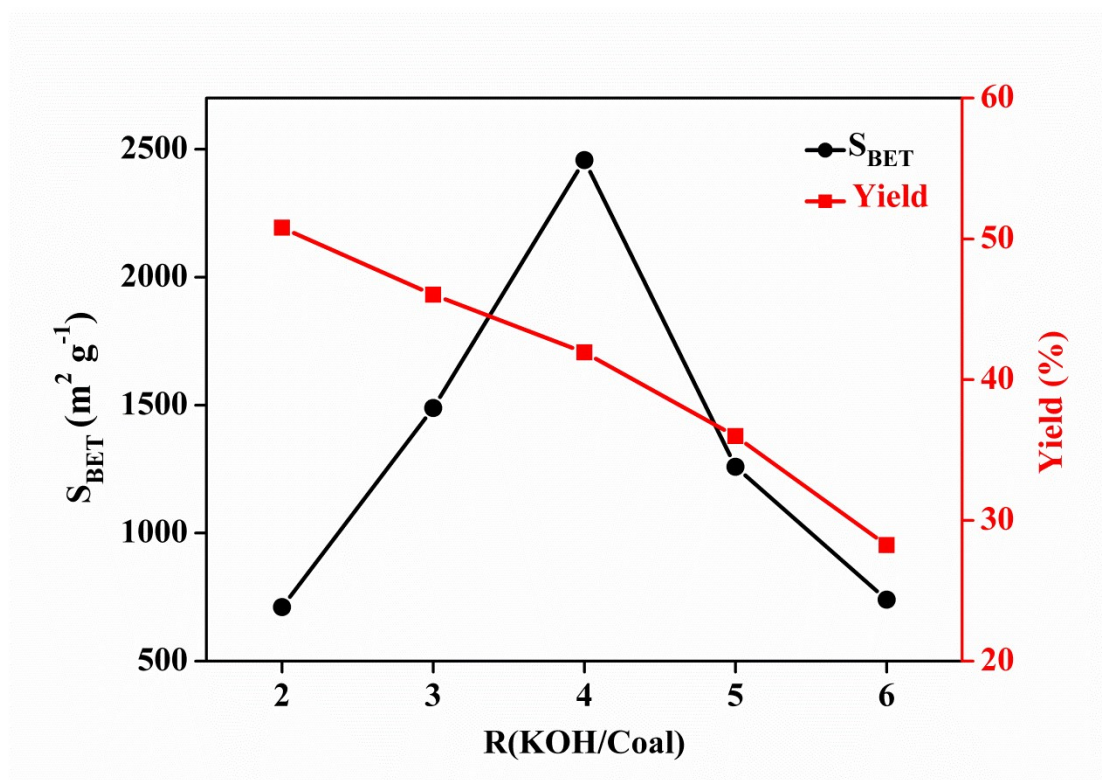

**Fig. S2 Effect of KOH/coal ratio on the BET surface area and yield**

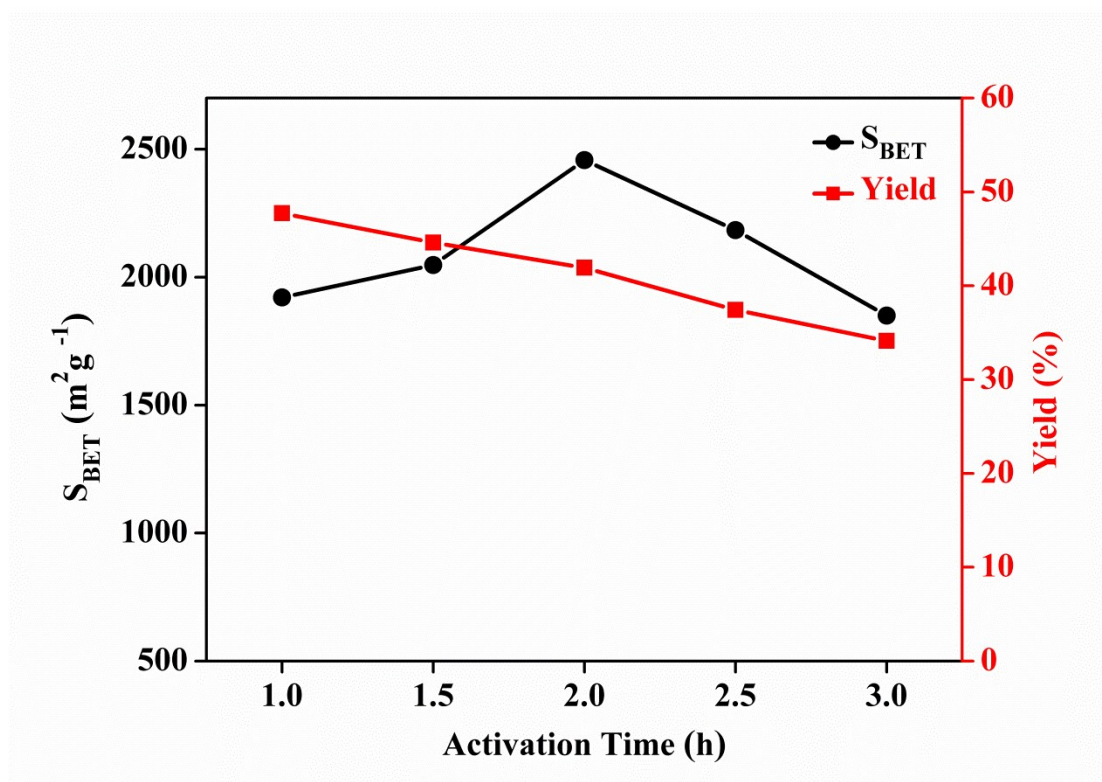

Fig. S3 Effect of activation time on the BET surface area and yield

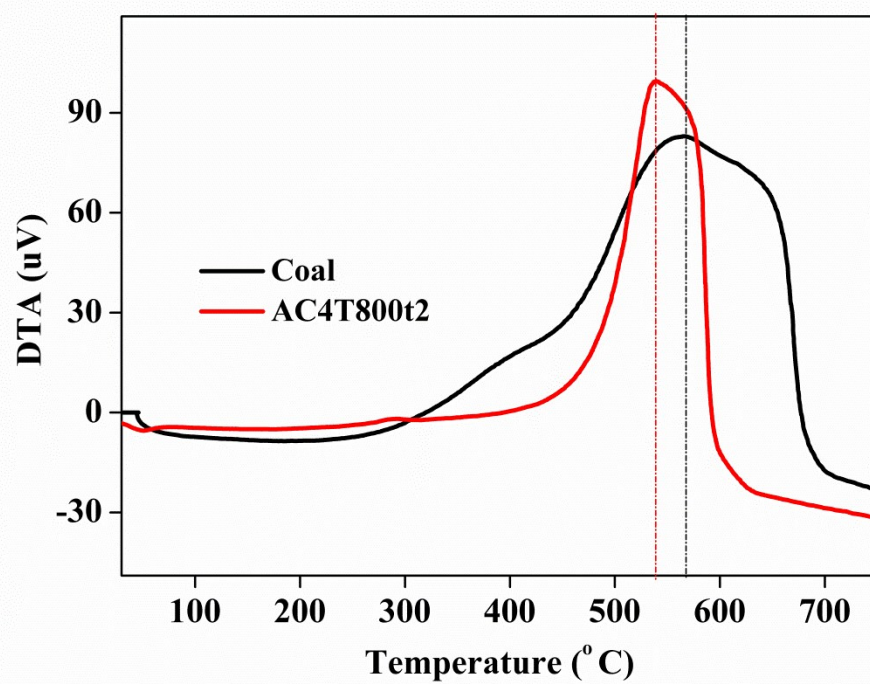

**Fig. S4 DTA curves of Coal and AC4T800t2.**

**Table S1 Effect of activation time on porous texture**

| <b>Sample</b>      | <b>Yield<br/>(%)</b> | <b>BET<br/>(m<sup>2</sup>/g)</b> | <b>V<sub>mic</sub><br/>(cm<sup>3</sup>/g)</b> | <b>V<sub>t</sub><br/>(cm<sup>3</sup>/g)</b> |
|--------------------|----------------------|----------------------------------|-----------------------------------------------|---------------------------------------------|
| <b>AC4T800t1</b>   | <b>47.73</b>         | <b>1921</b>                      | <b>0.7558</b>                                 | <b>1.209</b>                                |
| <b>AC4T800t1.5</b> | <b>44.61</b>         | <b>2048</b>                      | <b>0.7553</b>                                 | <b>1.286</b>                                |
| <b>AC4T800t2</b>   | <b>41.93</b>         | <b>2457</b>                      | <b>0.9622</b>                                 | <b>1.448</b>                                |
| <b>AC4T800t2.5</b> | <b>37.43</b>         | <b>2184</b>                      | <b>0.8414</b>                                 | <b>1.377</b>                                |
| <b>AC4T800t3</b>   | <b>34.12</b>         | <b>1850</b>                      | <b>0.7364</b>                                 | <b>1.217</b>                                |

**Keeping KOH/coal ratio at 4 and activation temperature at 800 °C**

**Table S2 Porous texture of ACs as working electrode**

| <b>Sample</b>      | <b>BET<br/>(m<sup>2</sup>/g)</b> | <b>V<sub>mic</sub><br/>(cm<sup>3</sup>/g)</b> | <b>V<sub>t</sub><br/>(cm<sup>3</sup>/g)</b> | <b>V<sub>mic</sub>/V<sub>t</sub><br/>(%)</b> | <b>C<br/>(F/g)</b> |
|--------------------|----------------------------------|-----------------------------------------------|---------------------------------------------|----------------------------------------------|--------------------|
| <b>AC6T800t2</b>   | <b>740</b>                       | <b>0.2841</b>                                 | <b>0.5289</b>                               | <b>53.72</b>                                 | <b>161</b>         |
| <b>AC5T800t2</b>   | <b>1259</b>                      | <b>0.5384</b>                                 | <b>0.7856</b>                               | <b>68.53</b>                                 | <b>208</b>         |
| <b>AC3T800t2</b>   | <b>1498</b>                      | <b>0.6554</b>                                 | <b>0.8372</b>                               | <b>78.28</b>                                 | <b>267</b>         |
| <b>AC4T800t2.5</b> | <b>2184</b>                      | <b>0.8414</b>                                 | <b>1.377</b>                                | <b>61.10</b>                                 | <b>346</b>         |
| <b>AC4T800t2</b>   | <b>2457</b>                      | <b>0.9622</b>                                 | <b>1.448</b>                                | <b>66.45</b>                                 | <b>384</b>         |
